# Supplementary material
Source: PubMed Central journal article supplement (PMC7964159)
Supplement: 1809_table.pdf [file 1809_table.pdf]

**On-line Table: Correlations among measures in the MCI group**

|                  | t- $\tau$<br>and<br>PET | p- $\tau$<br>and<br>PET | A $\beta$ 42<br>and<br>PET | t- $\tau$ :<br>A $\beta$ 42 and<br>PET | p- $\tau$ :<br>A $\beta$ 42 and<br>PET | MRI and<br>PET   | t- $\tau$<br>and MRI | p- $\tau$<br>and<br>MRI | A $\beta$ 42<br>and<br>MRI | t- $\tau$ :<br>A $\beta$ 42 and<br>MRI | p- $\tau$ :<br>A $\beta$ 42 and<br>MRI |
|------------------|-------------------------|-------------------------|----------------------------|----------------------------------------|----------------------------------------|------------------|----------------------|-------------------------|----------------------------|----------------------------------------|----------------------------------------|
| Hippocampus      | -.13                    | -.23                    | .12                        | -.11                                   | -.20                                   | .50 <sup>a</sup> | -.11                 | -.17                    | .17                        | -.14                                   | -.20                                   |
| Entorhinal       | -.13                    | -.21                    | .05                        | -.09                                   | -.15                                   | .64 <sup>a</sup> | -.10                 | -.18                    | .03                        | -.14                                   | -.19                                   |
| Parahippoc.      | .01                     | -.06                    | .02                        | .03                                    | -.02                                   | .20              | -.10                 | -.11                    | .13                        | -.13                                   | -.13                                   |
| Retrosplenial    | .03                     | -.04                    | .00                        | .04                                    | .02                                    | .36 <sup>a</sup> | -.06                 | -.11                    | .11                        | -.11                                   | -.15                                   |
| Precuneus        | -.08                    | -.15                    | .00                        | -.03                                   | -.09                                   | .31              | -.11                 | -.11                    | -.01                       | -.09                                   | -.11                                   |
| Inf. Parietal    | -.08                    | -.16                    | .13                        | -.08                                   | -.15                                   | .51 <sup>a</sup> | -.04                 | -.04                    | -.01                       | -.05                                   | -.04                                   |
| Supramarginal    | .04                     | -.03                    | .00                        | .05                                    | .00                                    | .29              | -.03                 | -.01                    | .00                        | -.07                                   | -.05                                   |
| Mid. Temporal    | -.15                    | -.29                    | .17                        | -.16                                   | -.26                                   | .31              | -.17                 | -.16                    | .00                        | -.18                                   | -.17                                   |
| Lat. orb. front. | -.09                    | -.20                    | -.01                       | -.04                                   | -.13                                   | .16              | .02                  | .00                     | -.05                       | -.04                                   | -.03                                   |
| Med. orb. front. | -.12                    | -.25                    | .04                        | -.08                                   | -.19                                   | .20              | -.02                 | -.04                    | -.05                       | -.03                                   | -.04                                   |

<sup>a</sup>  $P < .05$ , corrected for 10 region-of-interest comparisons.
